# Supplementary material
Source: PubMed Central journal article supplement (PMC6642371)
Supplement: pnas.1821863116.sapp.pdf [file pnas.1821863116.sapp.pdf]

## Supplementary Information for

Interspecies analysis of MYC targets identifies tRNA synthetases as mediators of growth and survival in MYC-overexpressing cells

Jonathan Zirin<sup>a</sup>, Xiaochun Ni<sup>a</sup>, Laura M. Sack<sup>a</sup>, Donghui Yang-Zhou<sup>a</sup>, Yanhui Hu<sup>a</sup>, Roderick Brathwaite<sup>a</sup>, Martha L. Bulyk<sup>a,b</sup>, Stephen J. Elledge<sup>a,b,c</sup>, and Norbert Perrimon<sup>a,c,1</sup>

<sup>a</sup> Department of Genetics, Harvard Medical School, 77 Avenue Louis Pasteur, Boston, MA 02115, USA

<sup>b</sup> Division of Genetics, Brigham and Women's Hospital, Boston, Massachusetts 02115

<sup>c</sup> Howard Hughes Medical Institute, 77 Avenue Louis Pasteur, Boston, MA 02115, USA

**<sup>1</sup>To whom correspondence should be addressed**

**Email:** [perrimon@genetics.med.harvard.edu](mailto:perrimon@genetics.med.harvard.edu)

### **This PDF file includes:**

Supplementary Materials and Methods  
Figs. S1 to S3  
Legends for Supplementary Datasets S1 to S6

## Supplemental Materials and Methods

### qPCR primers

*alpha-tubulin*, fwd: CAACCAGATGGTCAAGTGCG  
*alpha-tubulin*, rev: ACGTCCTTGGGCACAACATC

*GAPDH*, fwd: CCAATGTCTCCGTTGTGGA  
*GAPDH*, rev: TCGGTGTAGCCCAGGATT

*white*, fwd: AGGCAGCAAACACCCATCTG  
*white*, rev: CCCGAAGCCCTGGTTAATG

*surf6*, fwd: GAGATCGTGAAATGTCTGCGG  
*surf6*, rev: GGGCACTTTGTGAATGGTCAG

*CG7993*, fwd: CAGGAAACCAAAAACCCGCAA  
*CG7993*, rev: TCCGTCCAAAACAGCATTGT

*CG14230*, fwd: TTGCACGGCGAAAAGCTAAGA  
*CG14230*, rev: TCATCCTCTCCGAATACCCTG

*CG8368*, fwd: GAAAATCCGCAATTACGATGCTG  
*CG8368*, rev: GCCGACAACCTGATTGTA CTGAT

*CG12050*, fwd: CGATGGAAGATTCATGTTTCGTGC  
*CG12050*, rev: GGACTCGGGTAAGTTCGCC

*Fib*, fwd: CTCCGTTGAGACCAATGGC  
*Fib*, rev: ACATGCGAGACTGTCGTTCC

*Nop56*, fwd: TCGAACCTGTATGTGCTGTACG  
*Nop56*, rev: GAAAGGTGCAAATCCAGCCAG

*CG8858*, fwd: TGATCCTCAAATGAACTCGCC  
*CG8858*, rev: GCCTCTACGGGTATTTGCACA

*Nopp140*, fwd: AGCTCCTGCACTAACAAACGG  
*Nopp140*, rev: CCTTCTTGCCGACAGCCTT

*Aats-tyr*, fwd: CCATGTCGAAGATTGCCGATT  
*Aats-tyr*, rev: TTGTCCAGATAGGCGTGGAGA

*eIF3-S9*, fwd: GAAGCTGAAGTTGGTCATCAACA  
*eIF3-S9*, rev: TCTGGCCTGCTTGTACTCCA

*CG9791*, fwd: ATCAGCCTAACGGGCCTTTTG  
*CG9791*, rev: GACAAGTTCGTCTCCGGTTTT

*Rrp45*, fwd: AGTGACCTGCGAAATGGGAC  
*Rrp45*, rev: ACACCGCCAAGATATACGTTCA

*CG1463*, fwd: TGTCCCAAATGCGAGGTGAAA  
*CG1463*, rev: CTCAGCGGTACGAACTTGGT

*sesB*, fwd: GCCAACGTCATCAGATACTTCC  
*sesB*, rev: AAAGCACAGAGAGGTAGCACC

*Nmt*, fwd: GGCTTCAGTGTCTGCGAATG  
*Nmt*, rev: TGTGGACCAAATGCAAACCTCT

*CG10426*, fwd: ATACGATGTCAGTTTCGCCAAG  
*CG10426*, rev: GCTTTTGAGGGTGCTCCCATT

*path*, fwd: GGGACAATCCGCATCCAACAA  
*path*, rev: GGAGCACATGAAGGCAAATGG

*mRpl49*, fwd: ATCCCGCGAAGTTCAGGAG  
*mRpl49*, rev: CCGGATGGATATTTTGGCTTCTC

*Rab39*, fwd: CGCCGAGTTATCCGATCCC  
*Rab39*, rev: TTCCGGTAGTAGGACTTGGTG

*CG6767*, fwd: TCCACTCCAGAATGCCGAAC  
*CG6767*, rev: GACTATCCGCTGGGCCAAAT

*ced-6*, fwd: TTCAGCTTCATTGCCAAGACG  
*ced-6*, rev: CATCGCCATTTCGTTTGCAT

*CG4611*, fwd: TTATTCTGCCTGCAACTTGGTC  
*CG4611*, rev: AAACCGGCTTGTTGATCCGT

*ps*, fwd: ACGCCTGCAAGATGATCCTC  
*ps*, rev: AGCCGGTCGGATTAAAGTTGG

*Gfat2*, fwd: GCAGCGATCCGATGAGGATAA  
*Gfat2*, rev: GCCGAAAGTG TAGCCAGGA

*rhea*, fwd: ATGGTGGAAGAGTCAGTGGC  
*rhea*, rev: TCGTTTCGTGTTGCAAGAAG

*pyx*, fwd: TCGGGGAGAAACCGAGCTA  
*pyx*, rev: CGCAAGGCTCATAAGGAAGAA

*CG11523*, fwd: CCACTTGCTGCGTTCAGGT  
*CG11523*, rev: CTGTCCCTCGTCTATGGTGTCTG

*CapG*, fwd: TGGGACACGAGTCCTTTTCG  
*CapG*, rev: GCCATGTTTGC GTTCTCATTG

*bcgn*, fwd: AGCCCAAGACGCTGGTTTT  
*bcgn*, rev: TCCGCGTAAAGCTCCAAATCC

*Vps36*, fwd: CTCACCACACACCGACTGTTT  
*Vps36*, rev: GAGGCAGTAGTCTCTTCGCTG

*crn*, fwd: AATCTCCGCAAGAACCGCAT  
*crn*, rev: GTTCCGGTGCTCATTGTCC

*YARS*, fwd: ACCTACACAGCTTACGTGGACC  
*YARS*, rev: CCAGCAACTTGTTTCAGTGCAC

*AARS*, fwd: GTGAAGGTGGATGACAGCAGTG  
*AARS*, rev: CCACTTTCAGGTCACCGTAGATG

*DARS*, fwd: GCCTGAGGCAGAAGGAGAAGAG  
*DARS*, rev: ATGGCAGATGCCAGACTGGAGA

*RARS*, fwd: GAAACAGTGCGCCTCATGGATC  
*RARS*, rev: AGCCATACGCAACGGATGTCTG

*TARS*, fwd: CTTCAACAGCCGACTCTGGATG  
*TARS*, rev: GGCAGTTCTCGCCAGGACCTT

*IARS*, fwd: CCTCTTTGGACAACCGCCTTTC  
*IARS*, rev: GGCATCAGCACCATACTTCTGG

*EPRS*, fwd: TTGACCCAGTGGCTCCACGATA  
*EPRS*, rev: CACAGGCTTCAAGCCAACCTCA

#### **Fly Stocks:**

*Dmef2-Gal4* (BDSC: 25756), *UAS-Myc* (BDSC: 9674 and 9675),

**UAS-RNAi (TRiP collection at BDSC):** 33644, 51455, 36707, 51820, 25962, 38953, 50651, 26211, 26230, 36728, 54834, 42530, 34889, 31055, 34838, 43298, 31373, 52902, 28592, 65030, 29619, 60121, 38340, 25864, 34594, 34725, 31556, 34615, 32380, 32343, 34975, 26779, 50683, 31402, 35761, 42513, 28775, 29535, 32889, 31334, 31924, 31752, 32976, 31762, 50733, 62316, 34827, 38385, 38941, 31766, 34830, 32920, 28685, 35765, 28296, 31175, 32880, 33373, 42553, 28889, 40934, 26214, 34740, 51849, 42542, 26216, 34037, 41701, 34971, 33685, 27549, 28594, 28931, 31141, 36662, 38535, 25783, 25784, 36123, 33686, 42935, 35484, 33694, 51021, 33382, 52980, 34580, 51892, 40863, 26212, 38290, 35439, 65087, 34349, 33426, 27516, 53311, 38962, 51836, 31297, 53995, 25953, 31769, 42635, 32931, 32999, 33913, 28950, 58202, 34894, 28004, 31230, 36661, 64027, 33996, 43545, 36921, 28513, 34645, 28387, 33915, 33914, 34563, 34016, 28914, 41696, 27489, 34378, 34394, 28326, 41966, 32490, 32901, 26290, 50727, 38286, 42528, 28317, 42606, 55327, 34886, 58176

**UAS-RNAi (VDRC collection):** 18182, 37726, 5527, 39572, 36504, 9129, 25590, 30465, 25510, 44679, 16003, 8464, 48241, 45385, 46794, 42976, 24813, 30046, 46902, 38793, 32621, 13793, 32810, 20415, 8767, 7433, 16550, 40232, 45840, 29439, 41790, 24709, 26524, 21461, 27352, 38133, 35112, 5229, 22326, 9134, 35325, 28246, 44649, 35507, 6932, 12759, 37336, 13331, 19636, 30485, 31436, 22612, 26651, 25101, 17187, 7518, 27482, 38243, 12548, 47790, 28132,

19097, 9507, 19855, 28215, 28019, 35314, 45582, 23075, 20824, 10675, 25976, 20529, 10461, 37933, 23017, 10614, 19150, 26413, 52457, 37863, 10374, 25140, 21814, 16061, 46667, 21053, 31340, 20336, 35988, 41096, 40541, 22924, 32163, 16846, 11521, 39776, 41928, 23949, 34994

**UAS-RNAi (NIG collection):** 11188R-2, 30170R-2, 17054R-2, 11804R-1, 10286R-1, 11523R-4, 13890R-1, 14230R-1, 1463R-2, 14641R-1, 15547R-3, 1607R-3, 17018R-1, 2225R-1, 2889R-2, 6572R-3, 32104R-1, 4611R-1, 4646R-4, 6071R-2, 6767R-1, 6928R-1, 7339R-1, 7739R-3 , 8858R-4, 1044R-2, 8357R-2, 11166R-3, 31731R-3, 18374R-1, 5688R-1, 17530R-2, 4647R-1, 7436R-1, 1553R-1, 13849R-3 , 3424R-2, 17725R-2, 2488R-1, 7487R-3, 9606R-1, 4510R-2, 9791R-2 , 10496R-1, 4561R-2, HMJ21228, HMJ21046, HMJ21018

Flies were reared at 27°C and fed with ‘standard’ food composed of 16.5 g/L yeast, 9.5 g/L soy flour, 71 g/L cornmeal, 5.5 g/L agar, 5.5 g/L malt, 7.5% corn syrup, 0.4% propionic acid, and 1.3% Tegosept.

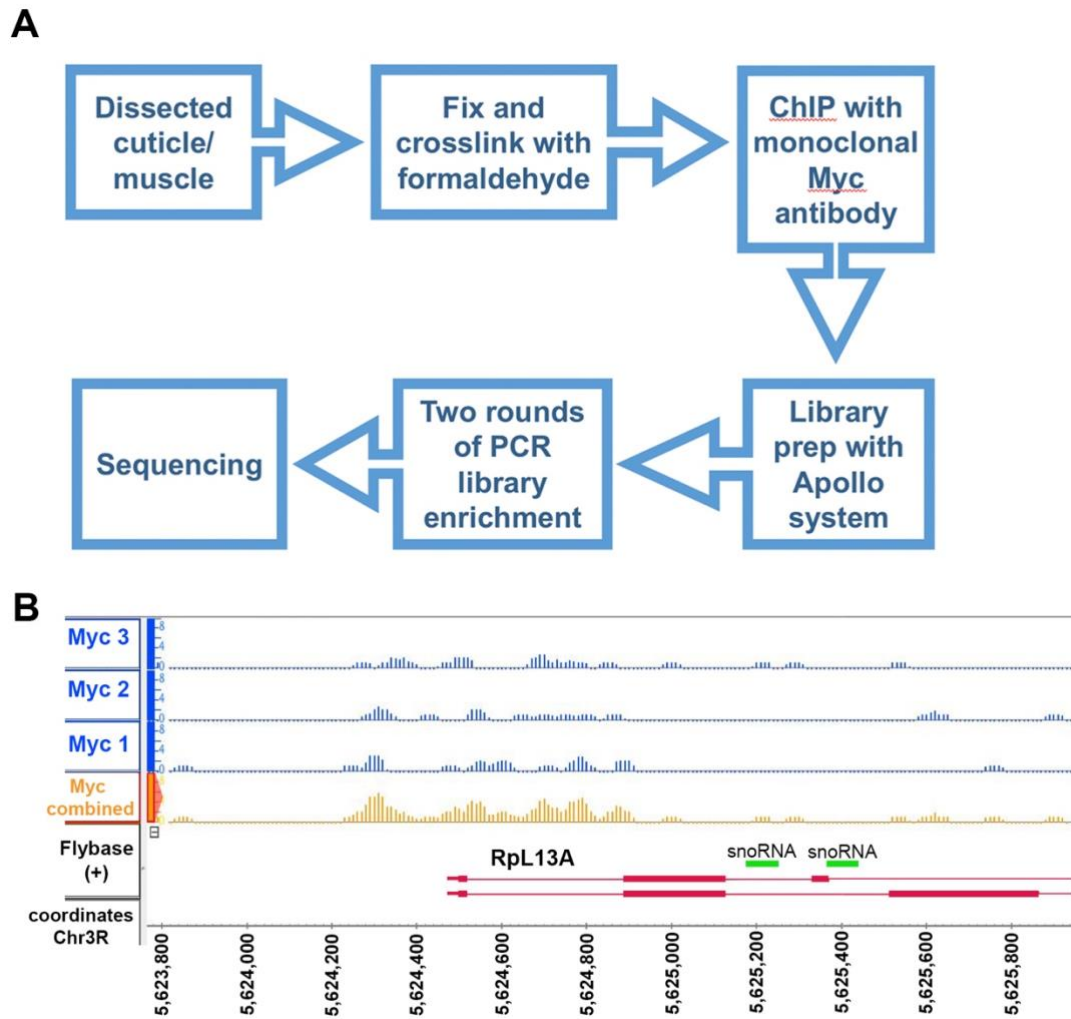

**Figure S1. Myc ChIP-seq procedure and peak calling**

(A) Outline of Myc Chromatin immunoprecipitation-high throughput sequencing (ChIP-seq) protocol. (B) ChIP-seq tracks for Myc at the *Rpl13A* gene locus. Uniquely mapped, duplication removed reads from 3 replicates (blue) from WT 3<sup>rd</sup> instar larval muscles were pooled together to generate finalized peaks (orange).

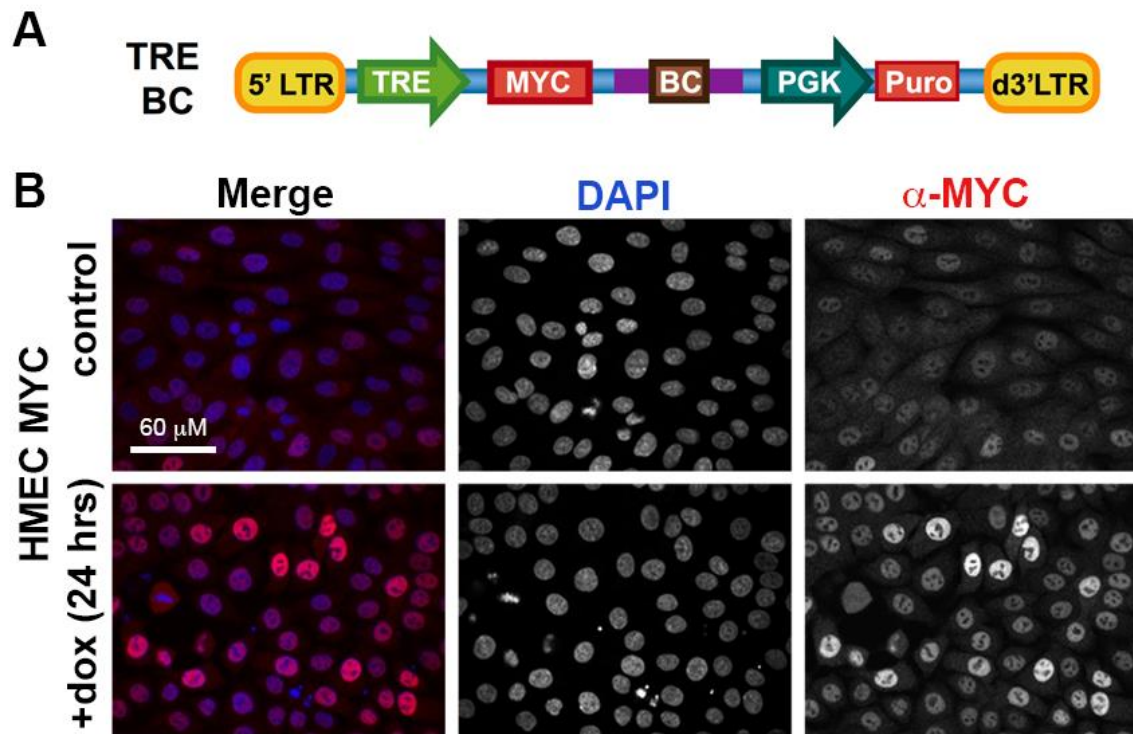

**Figure S2. Inducible MYC expression in Human Mammary Epithelial Cells (HMECs)**

(A) Schematic of inducible MYC vector stably transduced into HMECs. Cells had previously been transduced with a lentivirus carrying the reverse tetracycline transactivator (rtTA). LTR – Long Terminal Repeat; TRE – tetracycline responsive element promoter; BC – Barcode; PGK – phosphoglycerate kinase 1 promoter; Puro – puromycin resistance. (B) HMEC MYC cells +/- dox (10ng/ml) for 24 hrs. Cells stained with DAPI (blue) and  $\alpha$ -MYC (red). Note the increased MYC expression in dox-treated cells compared to untreated control.

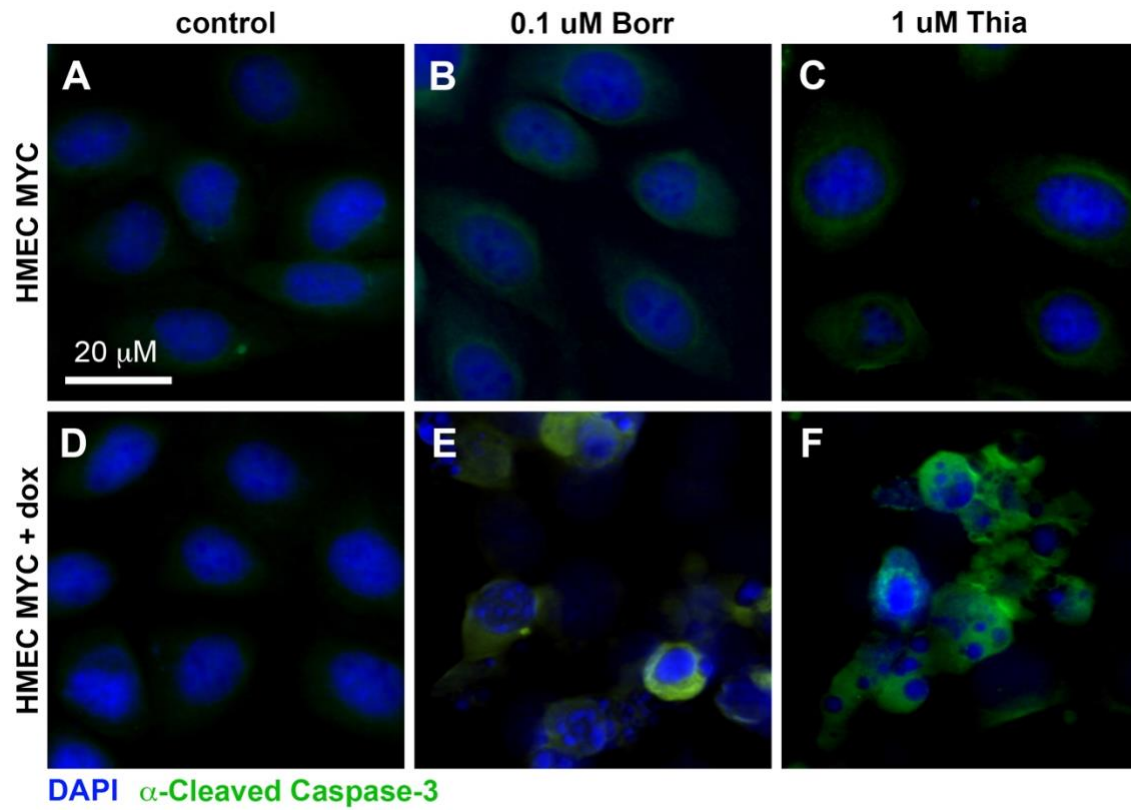

**Figure S3. aaRS inhibitors trigger apoptosis in HMEC-MYC cells.**

(A-C) Control and drug treated uninduced HMEC-MYC cells are viable. Borrelidin or Thiaisoleucine treatment triggers cell death of dox-induced HMEC-MYC, but not control HMEC-MYC cells. Cells stained with DAPI (blue) and  $\alpha$ -Cleaved Caspase-3 (green).



**Dataset S1:** FPKM from RNA-seq of S2R+ cells 0 to 180 minutes after insulin stimulation (20 min intervals, 3 samples each time point).

**Dataset S2:** Overlap of insulin temporally differentially expressed genes and nucleolus regulator genes

**Dataset S3:** Screen of RNAi lines targeting 163 insulin responsive nucleolar regulator genes

**Dataset S4:** Nucleolar size resulting from gene knockdown in larval muscle.

**Dataset S5:** Myc ChIP-Seq genes within 5kb and 3kb of peak.

**Dataset S6:** Overlap of insulin/nucleolus gene set with expression data
